# Supplementary material for: Secondary Metabolites from the Nematode-Trapping Fungus Dactylellina haptotyla YMF1.03409
Source: MDPI journal article supplement (doi:10.3390/microorganisms11112693), 2023-11-03
Supplement: s1 [file s1]

Supplementary materials for

## Secondary metabolites from the nematode-trapping fungus

### *Dactylellina haptotyla* YMF1.03409

Hongmei Lei, Guangke Zhang, Peiji Zhao and Guohong Li\*

State Key Laboratory for Conservation and Utilization of Bio-Resources in Yunnan,  
School of Life Sciences, Yunnan University, Kunming, Yunnan 650091, China

\*Correspondence: ligh@ynu.edu.cn (G.L.)

#### Content

**Figure S1.** The nematocidal activity of compounds **1**, **2**, **4**, **5**, **6**, **8**, and **9**

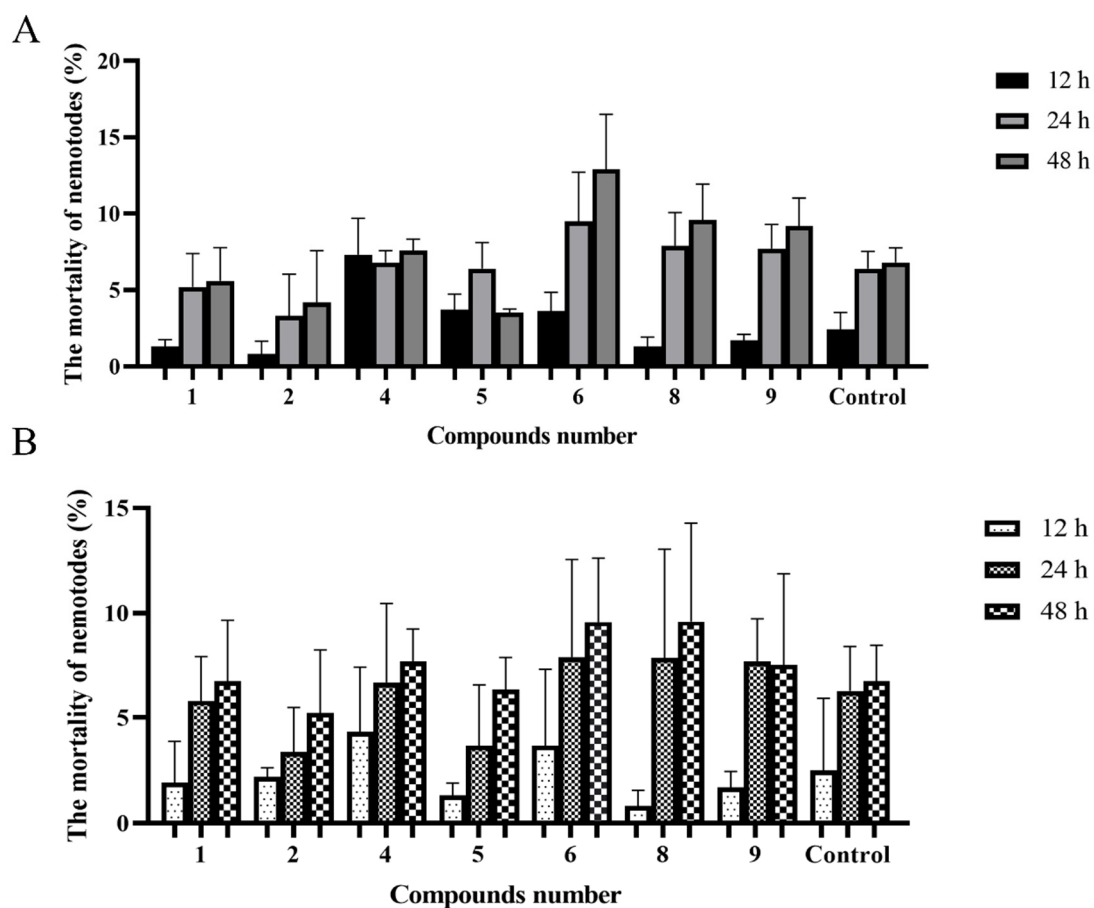

**Figure S1.** The nematicidal activity of compounds **1**, **2**, **4**, **5**, **6**, **8**, and **9**. (A) Activity against *M. incognita* of compounds at 400 ppm. (B) Activity against *P. redivivus* of compounds at 400 ppm.
